# Supplementary material for: No Statistically Apparent Difference in Antifungal Effectiveness Observed Among Trimethoprim/Sulfamethoxazole Plus Clindamycin or Caspofungin, and Trimethoprim/Sulfamethoxazole Monotherapy in HIV-Infected Patients with Moderate to Severe Pneumocystis Pneumonia: Results of an Observational Multicenter Cohort Study
Source: Springer Nature journal article supplement (doi:10.1007/s40121-021-00586-5), 2022-01-20
Supplement: MOESM1 [file 20052596]

SUPPLEMENTARY MATERIAL

**No Statistically Apparent Difference in Antifungal Effectiveness Observed Among Trimethoprim/Sulfamethoxazole Plus Clindamycin or Caspofungin, and Trimethoprim/Sulfamethoxazole Monotherapy in HIV-Infected Patients with Moderate to Severe Pneumocystis Pneumonia: Results of an Observational Multicenter Cohort Study**

Yinqiu Huang<sup>1,2#</sup>, Xiaoqing He<sup>1#</sup>, Hui Chen<sup>3</sup>, Vijay Harypursat<sup>1</sup>, Yanqiu Lu<sup>1</sup>, Jing Yuan<sup>1</sup>, Jingmin Nie<sup>1</sup>, Min Liu<sup>1</sup>, Jianhua Yu<sup>4</sup>, Yulin Zhang<sup>5</sup>, Zhongsheng Jiang<sup>6</sup>, Yingmei Qin<sup>7</sup>, Lijun Xu<sup>8</sup>, Guoqiang Zhou<sup>9</sup>, Defa Zhang<sup>10</sup>, Xiaohong Chen<sup>11</sup>, Baisong Zheng<sup>12</sup>, Yaokai Chen<sup>1, 2\*</sup>

<sup>1</sup>*Division of Infectious Diseases, Chongqing Public Health Medical Center, Chongqing, China*

<sup>2</sup>*National Key Laboratory for Infectious Diseases Prevention and Treatment with Traditional Chinese Medicine, Chongqing Public Health Medical Center, Chongqing, China*

<sup>3</sup>*School of Biomedical Engineering, Capital Medical University, Beijing, China*

<sup>4</sup>*Department of Infectious Diseases, Xixi Hospital of Hangzhou, Zhejiang, China*

<sup>5</sup>*Division of Infectious Diseases, Beijing Youan Hospital, Capital Medical University, Beijing, China,*

<sup>6</sup>*Division of Infectious Diseases, Liuzhou People's Hospital, Liuzhou, Guangxi, China*

<sup>7</sup>*Division of Infectious Diseases, the Fourth People's Hospital of Nanning, Guangxi, China*

<sup>8</sup> *Division of Infectious Diseases, the First Affiliated Hospital, College of Medicine, Zhejiang University, Zhejiang, China*

<sup>9</sup>*Division of Infectious Diseases, the First Hospital of Changsha, Hunan, China*

<sup>10</sup> *Department of Infectious Diseases, Tianjin Second People's Hospital, Nankai University,*

*Tianjin, China*

<sup>11</sup>*Department of Infectious Diseases, the Fourth Affiliated Hospital of Harbin Medical*

*University, Harbin, China*

<sup>12</sup>*Institute of Virology and AIDS Research, the First Hospital of Jilin University, Changchun*

*130021, China*

*#These authors contributed equally to this work*

*\*Correspondence to:*

*Dr. Yao-Kai Chen, Division of Infectious Diseases, Chongqing Public Health Medical Center, 109*

*Baoyu Road, Geleshan Town, Shapingba District, Chongqing 400036, China.*

*Email: yaokaichen@hotmail.com.*

Table 1.

| No. | Institution                                                             | Name of the ethics committee                                                                 | Ethics Approval No. |
|-----|-------------------------------------------------------------------------|----------------------------------------------------------------------------------------------|---------------------|
| 1   | Chongqing Public Health Medical Center                                  | Ethics Committee of the Chongqing Public Health Medical Center                               | 2019-003-02-KY      |
| 2   | Beijing Youan Hospital, Capital Medical University                      | The Institutional Ethics Committee of Beijing Youan Hospital, Capital Medical University     | LL-2019-053-K       |
| 3   | The Fourth Affiliated Hospital of Harbin Medical University,            | Ethics Committee of the Fourth Affiliated Hospital of Harbin Medical University              | 2019-WZYSLLSC-01    |
| 4   | Tianjin Second People's Hospital, Nankai University,                    | Medical Ethics Committee of Tianjin Second People's Hospital                                 | 2019-07             |
| 5   | The First Hospital of Changsha                                          | Ethics committee of the First Hospital of Changsha                                           | KX-2019028          |
| 6   | Guangzhou Eighth People's Hospital                                      | Ethics committee of Guangzhou Eighth People's Hospital                                       | 201908121           |
| 7   | Liuzhou People's Hospital                                               | Ethics committee of Liuzhou People's Hospital                                                | 2019-02-01          |
| 8   | The Third People's Hospital of Guilin                                   | Ethics committee of the Third People's Hospital of Guilin                                    | 2019-003-02-KY      |
| 9   | Shenzhen Third People's Hospital                                        | Ethics committee of Shenzhen Third People's Hospital                                         | 2019-005            |
| 10  | Chengdu Public Health Clinical Medical Center                           | Ethics committee of Chengdu Public Health Clinical Medical Center                            | YJ-K2019-008-01     |
| 11  | Kunming Third People's Hospital                                         | Ethics committee of Kunming Third People's Hospital                                          | 2020052602          |
| 12  | Yunnan Provincial Infectious Disease Hospital                           | Ethics committee of Yunnan Provincial Infectious Disease Hospital                            | 201905              |
| 13  | The Fourth People's Hospital of Nanning                                 | Ethics committee of the Fourth People's Hospital of Nanning                                  | 2019-005            |
| 14  | Longtan Hospital of Guangxi Zhuang Autonomous Region                    | Ethics committee of Longtan Hospital of Guangxi Zhuang Autonomous Region                     | 20191005            |
| 15  | The First Affiliated Hospital, College of Medicine, Zhejiang University | Ethics Committee of The Second Affiliated Hospital, School of Medicine, Zhejiang University. | No. 2019-034        |
| 16  | Xixi Hospital of Hangzhou                                               | Ethics Committee of Xixi Hospital of Hangzhou                                                | 2019-007            |

Table 2.

|                                                               | Enrolled Group<br>(n=320) | Excluded Group<br>(n=36) | p-value |
|---------------------------------------------------------------|---------------------------|--------------------------|---------|
| Age, median years (IQR)                                       | 48.0 (37.0, 56.0)         | 51.0 (38.2, 60.8)        | 0.440   |
| Male gender, n (%)                                            | 70 (21.88%)               | 6 (16.67%)               | 0.517   |
| BMI, median kg/m <sup>2</sup> (IQR)                           | 20.3 (18.5, 22.5)         | 21.3 (19.4, 23.2)        | 0.169   |
| Route of infection, n (%)                                     |                           |                          | 0.001   |
| MSM                                                           | 48 (15.00%)               | 15 (41.67%)              |         |
| Heterosexual                                                  | 180 (56.25%)              | 10 (27.78%)              |         |
| Other                                                         | 5 (1.56%)                 | 0 (0.00%)                |         |
| Unknown                                                       | 87 (27.19%)               | 11 (30.55%)              |         |
| ART, n (%)                                                    | 14 (4.38%)                | 5 (13.89%)               | 0.038   |
| Smoking, n (%)                                                | 114 (35.63%)              | 6 (16.67%)               | 0.028   |
| Alcohol use, n (%)                                            | 67 (20.94%)               | 3 (8.33%)                | 0.081   |
| Other medical conditions, n (%)                               |                           |                          |         |
| Diabetes mellitus                                             | 10 (3.13%)                | 5 (13.89%)               | 0.008   |
| Hypertension                                                  | 5 (1.56%)                 | 0 (0.00%)                | 1.000   |
| Tuberculosis                                                  | 34 (10.63%)               | 2 (5.56%)                | 0.536   |
| HIV RNA, median log <sub>10</sub> copies/mL<br>(IQR)          | 5.6 (5.1, 5.9)            | 5.2 (4.6, 5.5)           | 0.022   |
| CD4 <sup>+</sup> T-cell counts, cells/mm <sup>3</sup> , n (%) | 307                       | 28                       | 0.263   |
| <50                                                           | 239 (77.85%)              | 20 (71.43%)              |         |
| 50-100                                                        | 43 (14.01%)               | 3 (10.71%)               |         |
| 101-200                                                       | 19 (6.19%)                | 4 (14.29%)               |         |
| >200                                                          | 6 (1.95%)                 | 1 (3.57%)                |         |
| HGB, mean × 10 <sup>9</sup> /L ± SD                           | 117.19 ± 19.61            | 120.97 ± 19.45           | 0.285   |
| PLT, median × 10 <sup>9</sup> /L (IQR)                        | 237.0 (170.0, 300.0)      | 218.0 (172.3, 292.8)     | 0.544   |
| G test, IQR                                                   | 203.9 (72.2, 486.7)       | 127.9 (30.8, 325.0)      | 0.190   |

---

|                                     |                      |                      |       |
|-------------------------------------|----------------------|----------------------|-------|
| Scr, median $\mu\text{mol/L}$ (IQR) | 63.8 (52.5, 74.6)    | 67.2 (57.8, 83.3)    | 0.148 |
| AST, median U/L (IQR)               | 37.0 (27.0, 52.0)    | 29.5 (23.5, 46.1)    | 0.053 |
| ALT, median U/L (IQR)               | 22.0 (13.3, 38.0)    | 20.8 (15.3, 38.5)    | 0.801 |
| LDH, median U/L (IQR)               | 430.5 (327.0, 540.3) | 465.0 (328.3, 592.0) | 0.615 |
| PaO <sub>2</sub> , median kPa (IQR) | 57.0 (50.0, 63.0)    | 57.0 (49.7, 66.0)    | 0.617 |

---
